# Supplementary material
Source: Springer Nature journal article supplement (https://www.springermedizin.de/resource/supplementary/12931_2013_1507_MOESM9_ESM.pdf/9426356)

A

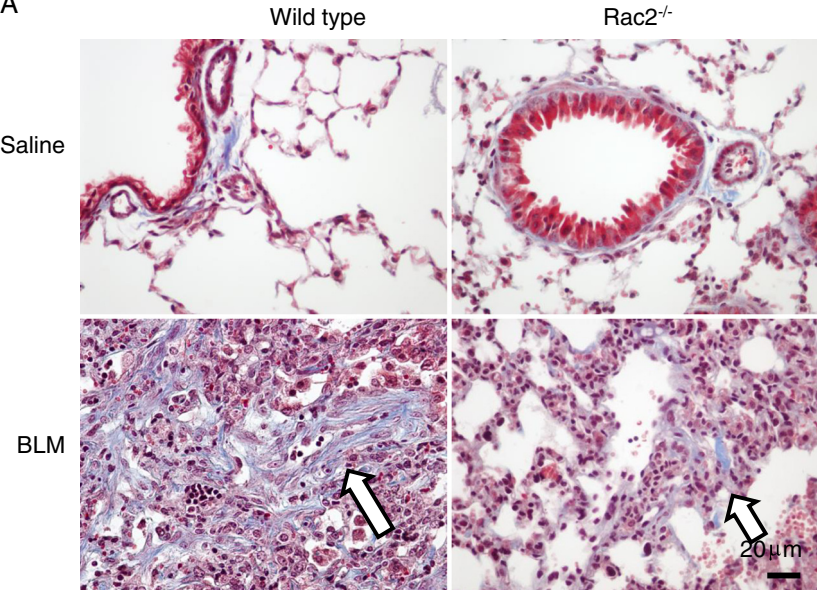

B

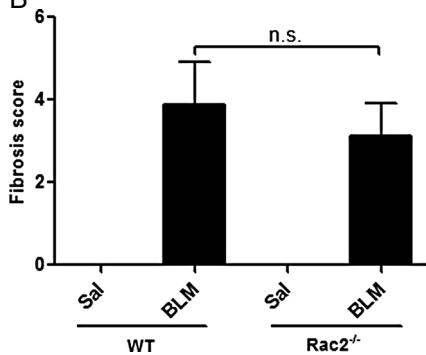

C

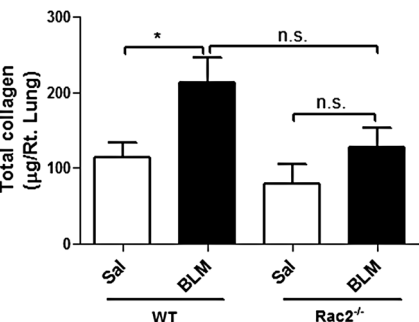

D

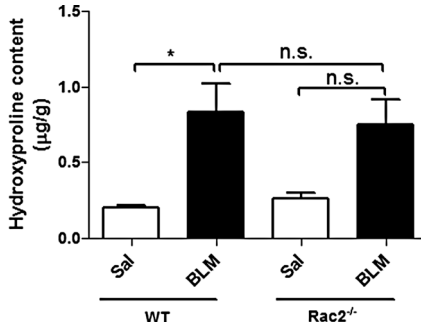

Supplement: MOESM9 [file 9426356]
